# Supplementary material for: Barriers, facilitators and needs to deprescribe benzodiazepines and other sedatives in older adults: a mixed methods study of primary care provider perspectives
Source: Springer Nature journal article supplement (doi:10.1186/s12877-024-05027-9), 2024-05-04
Supplement: MOESM1 [file 27057726]

## Additional File 1: Tables

**Appendix Table 1.** Survey results (N=126) – Patient material

| VARIABLE                                                                                | N (%)      |
|-----------------------------------------------------------------------------------------|------------|
| <b>Preference</b>                                                                       |            |
| Customizable material                                                                   | 88 (69.8)  |
| Standardized material                                                                   | 36 (28.6)  |
| No preference                                                                           | 2 (1.6)    |
| <b>Format</b>                                                                           |            |
| Flyers                                                                                  | 62 (49.2)  |
| Brochures                                                                               | 87 (69.1)  |
| App for smartphone                                                                      | 34 (27.0)  |
| Videos                                                                                  | 20 (15.9)  |
| Website                                                                                 | 26 (20.6)  |
| Schemes                                                                                 | 54 (42.9)  |
| Figures                                                                                 | 22 (17.5)  |
| Documents for relatives/caregivers                                                      | 63 (50.0)  |
| Material adapted for people with cognitive impairment                                   | 62 (49.2)  |
| Material adapted for people with visual impairment                                      | 46 (36.5)  |
| <b>Content</b>                                                                          |            |
| Explanations about risks and benefits of BSHs                                           | 112 (88.9) |
| Explanations about the discontinuation process                                          | 95 (75.4)  |
| Tapering schemes                                                                        | 92 (73.0)  |
| Explanations about treatment of withdrawal symptoms                                     | 67 (53.2)  |
| Explanations about alternative treatments of sleep problems                             | 100 (79.4) |
| Table/figure comparing the effectiveness of the different treatments for sleep problems | 50 (39.7)  |
| Recommendations for sleep hygiene                                                       | 101 (80.2) |
| Testimonials                                                                            | 46 (36.5)  |

**Abbreviations:** BSHs = Benzodiazepines and Sedative Hypnotics.

**Appendix Table 2.** Survey results (N=126) – Needs of PCPs

| VARIABLE                                                                                                                                                | N (%)      |
|---------------------------------------------------------------------------------------------------------------------------------------------------------|------------|
| <b>Format</b>                                                                                                                                           |            |
| Online training                                                                                                                                         | 79 (62.7)  |
| In-person training                                                                                                                                      | 47 (37.3)  |
| Online documents                                                                                                                                        | 77 (61.1)  |
| Printed documents                                                                                                                                       | 43 (34.1)  |
| Information on a website                                                                                                                                | 65 (51.6)  |
| Exchange with colleagues (e.g., in the context of quality circles)                                                                                      | 57 (45.2)  |
| App for smartphone                                                                                                                                      | 28 (22.2)  |
| <b>Content</b>                                                                                                                                          |            |
| Practical recommendations for (pharmacologic and non-pharmacologic methods) treatment of sleep problems in older people with current BSH consumption    | 111 (88.1) |
| Practical recommendations for (pharmacologic and non-pharmacologic methods) treatment of sleep problems in older people without current BSH consumption | 72 (57.1)  |
| Recommendations for follow-up of patients during the discontinuation process of BSHs                                                                    | 46 (36.5)  |
| Indications and contraindications for the prescription and deprescription of BSHs                                                                       | 62 (49.2)  |
| Deprescription Scheme for BSHs                                                                                                                          | 86 (68.3)  |
| Principles of CBT-I for the treatment of sleep problems                                                                                                 | 77 (61.1)  |
| Implementation of CBT-I for the treatment of sleep problems in the primary care practice                                                                | 72 (57.1)  |
| PCP would like to complete CBT-I training if possible                                                                                                   | 74 (58.7)  |
| Practical recommendations for the treatment of BSH withdrawal symptoms                                                                                  | 70 (55.6)  |
| Motivational interviewing for BSH discontinuation (e.g., videos/text providing examples of conversations about BSH discontinuation with patients)       | 33 (26.2)  |
| Shared-decision-making tools for BSH discontinuation                                                                                                    | 52 (41.3)  |

**Abbreviations:** BSH = Benzodiazepine and Sedative Hypnotic; CBT-I = cognitive behavioral therapy for insomnia; PCPs = primary care providers.

**Appendix Table 3.** TDF domains and constructs used for coding

| <b>Domains</b>                      | <b>Constructs</b>                                          |
|-------------------------------------|------------------------------------------------------------|
| Knowledge                           | Knowledge about condition/scientific rationale             |
|                                     | Schemas + mindsets + illness representations               |
|                                     | Procedural knowledge                                       |
| Skills                              | Competence/ability/skill assessment                        |
|                                     | Practice/skills development                                |
| Beliefs about capabilities          | Perceived competence                                       |
|                                     | Self-confidence/professional confidence                    |
| Beliefs about consequences          | Outcome expectancies                                       |
|                                     | Consequents                                                |
|                                     | Unrealistic optimism                                       |
| Motivation and goals                | Goal target/setting                                        |
|                                     | Goal priority                                              |
|                                     | Intrinsic motivation                                       |
|                                     | Transtheoretical model and stages of change                |
| Environmental context and resources | Resources/material resources (availability and management) |
| Social influences                   | Social support                                             |
|                                     | Social/group norms                                         |
|                                     | Social pressure                                            |
|                                     | Inter-group conflict                                       |
|                                     | Social comparisons                                         |
| Emotion                             | Affect                                                     |
|                                     | Anticipated regret                                         |
|                                     | Fear                                                       |
|                                     | Anxiety/depression                                         |
| Behavioral regulation               | Goal/target setting                                        |
|                                     | Self-monitoring                                            |
|                                     | Moderators of intention-behavior gap                       |
|                                     | Barriers and facilitators                                  |
| Nature of behaviors                 | Routine/automatic/habit                                    |
|                                     | Breaking habit                                             |
|                                     | Direct experience/past behavior                            |
|                                     | Representation of tasks                                    |

**Abbreviations:** TDF = Theoretical Domains Framework
